# Supplementary material
Source: PubMed Central journal article supplement (PMC3781981)
Supplement: 054338a8c9e900c1b6f1780eaee48848_genetics.113.154161-1.pdf [file 054338a8c9e900c1b6f1780eaee48848_genetics.113.154161-1.pdf]

## File S1

### Supporting Information

#### Derivation of equation (4)

Since  $Y_2 = X_0 + X_2$  and  $Y_1 = X_0 + X_1$ , we have

$$\begin{aligned}
 E[Y_2; Y_1 = i | T = \tau] &= E[X_0 + X_2; X_0 + X_1 = i | T = \tau] \\
 &= \sum_j E[X_0 + X_2; X_0 = j; X_1 = i - j | T = \tau] \\
 &= \sum_j E[X_0; X_0 = j; X_1 = i - j | T = \tau] + \sum_j E[X_2; X_0 = j; X_1 = i - j | T = \tau] \\
 &= \sum_j jP(X_0 = j, X_1 = i - j | T = \tau) \\
 &\quad + \sum_j E[X_2 | T = \tau] P(X_0 = j, X_1 = i - j | T = \tau) \\
 &= \sum_j jP(X_0 = j | T = \tau) P(X_1 = i - j | T = \tau) \\
 &\quad + E[X_2 | T = \tau] \sum_j P(X_0 = j, X_1 = i - j | T = \tau) \\
 &= \sum_j jP(X_0 = j | T = \tau) P(X_1 = i - j | T = \tau) + E[X_2 | T = \tau] P(X_0 + X_1 = i | T = \tau)
 \end{aligned}$$

#### Derivation of equations (5) and (6)

If  $X$  is a discrete random variable taking values in the non-negative integers  $\{0, 1, 2, \dots\}$ , then we define the probability generating function (pgf) of  $X$  as:

$$f_X(s) = E[s^X] = \sum_{x=0}^{\infty} P(X = x) s^x$$

Restating equation (4) in the terms of the probability generating functions, and using independence of  $(X_0 | T)$ ,  $(X_1 | T)$ ,  $(X_2 | T)$ , we obtain

$$\begin{aligned}
 \sum_i E[Y_2, Y_1 = i | T = \tau] s^i &= \sum_i E[X_2 | T = \tau] P(X_0 + X_1 = i | T = \tau) s^i \\
 &\quad + \sum_i \sum_j j P(X_0 = j | T = \tau) P(X_1 = i - j | T = \tau) s^{j-1} s^{i-j} s \\
 &= E[X_2 | T = \tau] f_{X_0+X_1 | T=\tau}(s) + s \sum_i f'_{X_0 | T=\tau}(s) P(X_1 = i - j | T = \tau) s^{i-j} \\
 &= E[X_2 | T = \tau] f_{X_0+X_1 | T=\tau}(s) + s f'_{X_0 | T=\tau}(s) \sum_{i=-\infty}^{\infty} P(X_1 = i - j | T = \tau) s^{i-j} \\
 &= E[X_2 | T = \tau] f_{X_0+X_1 | T=\tau}(s) + s f'_{X_0 | T=\tau}(s) \sum_{i-j=-\infty}^{\infty} P(X_1 = i - j | T = \tau) s^{i-j} \\
 &\quad (\text{since } -\infty < j < \infty) \\
 &= E[X_2 | T = \tau] f_{X_0 | T=\tau}(s) f_{X_1 | T=\tau}(s) + s f'_{X_0 | T=\tau}(s) f_{X_1 | T=\tau}(s)
 \end{aligned}$$

Thus, equation (5) holds; derivation of equation (6) is similar.

### Derivation of equations (7) and (8)

Consider the Poisson Process  $N$  with intensity  $\nu$ , where  $N(T) = \#$  {events of mutations occurring in time interval of length  $T$ }},

$f_{N(T)}(s) = e^{\nu t(s-1)}$  and  $T$  is the coalescence time before present. Let  $X_0, X_1, X_2$  denote the incremental changes of allele length of chromosomes 0, 1 and 2.  $(X_0|T), (X_1|T), (X_2|T)$  are conditionally independent and  $f_{U_k}(s) = \psi_k(s), k = 0, 1, 2$ .

Therefore, if  $\tau \leq t_0$ , it holds  $X_0|(T = \tau) = X_{0,1}|(T = \tau) + X_{0,2}|(T = \tau)$ , where  $X_{0,1}|T = \tau$  is the increment of allele size in the interval  $[t, t_0]$  and  $X_{0,2}|T = \tau$  is the increment in the interval  $[t_0, \tau]$ . Since  $X_{0,1}|(T = \tau)$  is independent of  $X_{0,2}|(T = \tau)$ , it holds that pgf  $f_{X_0|T=\tau}(s) = f_{X_{0,1}|T=\tau}(s) \cdot f_{X_{0,2}|T=\tau}(s)$ , where  $f_{X_{0,1}|T=\tau}(s) = f_{N(t-t_0)}(\psi_0(s)) = e^{\nu_0(t-t_0)(\psi_0(s)-1)}$ , and  $f_{X_{0,2}|T=\tau}(s) = f_{N(t_0-\tau)}(\psi_1(s)) = e^{\nu_1(t_0-\tau)(\psi_1(s)-1)}$ .

It follows that  $f_{X_0|T=\tau}(s) = \exp(\nu_0(t-t_0)(\psi_0(s)-1) + \nu_2(t_0-\tau)(\psi_1(s)-1))$ , and  $f_{X_1|T=\tau}(s) = f_{N(\tau)}(\psi_1(s)) = \exp(\nu_1\tau(\psi_1(s)-1))$ . Therefore, both equations (7) and (8) hold for  $\tau \leq t_0$ . Derivations for  $t_0 < \tau \leq t$  or  $\tau > t$  are similar.

### Derivation of computational expressions for equations (10) and (11)

Expected size of allele drawn from population 2, jointly with size of allele drawn from population 1 being equal to  $i$  is equal to  $E[Y_2, Y_1 = i] = \int_0^\infty E[y_2, Y_1 = i|T = \tau] f_T(\tau) d\tau$ , where  $f_T(\tau)$  is given in equation (1). However,  $T$  denotes the common ancestor time of chromosomes 1 and 2 sampled at time 0 from populations 1 and 2. Therefore, from Equ. (1), we have

$$f_T(\tau) = \begin{cases} 0 & \tau \leq t_0 \\ \frac{1}{2N_0} e^{-(\tau-t_0)/(2N_0)} & \tau > t_0 \end{cases}$$

If  $\tau \leq t_0$ ,  $f_T(\tau) = 0$  and  $E[Y_2; Y_1 = i] = 0$ .

If  $t_0 < \tau \leq t$ , from Equ. (5) we obtain  $\sum_i E[Y_2, Y_1 = i|T = \tau] s^i = E[X_2|T = \tau] f_{X_0|T=\tau}(s) f_{X_1|T=\tau}(s) + s f'_{X_0|T=\tau}(s) f_{X_1|T=\tau}(s)$   
where,

$$\begin{aligned} E[X_2|T] &= \tau f_{X_0|T=\tau}(s) f_{X_1|T=\tau}(s) \\ &= E[X_2|T = \tau] \exp(\nu_0(t-t_0)(\psi_0(s)-1) + \nu_1 t_0(\psi_1(s)-1)) \\ &= E[X_2|T = \tau] \exp(\nu_0(t-t_0)(b_0 s + \frac{d_0}{s} - 1) + \nu_1 t_0(b_1 s + \frac{d_1}{s} - 1)) \\ &= E[X_2|T = \tau] \exp((\nu_0(t-t_0)b_0 + \nu_1 t_0 b_1) s + \\ &\quad + (\nu_0(t-t_0)d_0 + \nu_1 t_0 d_1)/s - \nu_0(t-t_0) - \nu_1 t_0) \\ &= E[X_2|T = \tau] e^{((\nu_0(t-t_0)b_0 + \nu_1 t_0 b_1) s + (\nu_0(t-t_0)d_0 + \nu_1 t_0 d_1)/s)} e^{-\nu_0(t-t_0) - \nu_1 t_0} \\ &\quad (t_0 < \tau \leq t) \end{aligned}$$

By differentiating  $f_{X_2|T=\tau}(s)$  and setting  $s = 1$ , we obtain

$E[X_2|T = \tau] = (\nu_0(\tau-t_0)(b_0-d_0) + \nu_2 t_0(b_2-d_2)) \exp(\nu_0(\tau-t_0)(b_0+d_0-1) + \nu_2 t_0(b_2+d_2-1))$  ( $t_0 < \tau \leq t$ ). We denote  $b = \nu_0(t-t_0)b_0 + \nu_1 t_0 b_1$  and  $d = \nu_0(t-t_0)d_0 + \nu_1 t_0 d_1$ , to obtain  $e^{((\nu_0(t-t_0)b_0 + \nu_1 t_0 b_1) s + (\nu_0(t-t_0)d_0 + \nu_1 t_0 d_1)/s)} = e^{(bs+d/s)}$ . According to Equ. (9),

$$e^{(bs+d/s)} = \sum_{i \in \mathbb{Z}} I_i(2\sqrt{bd}) \left(\frac{b}{d}\right)^{i/2} s^i = \sum_{i \in \mathbb{Z}} \beta_i s^i \quad , |s| = 1,$$

where we denote  $\beta_i = I_i(2\sqrt{bd}) \left(\frac{b}{d}\right)^{i/2}$ , and  $I_i = I_{-i}$  is the modified Bessel function of the first type (Abramowitz and Stegun 1972), of integer order  $i$

Thus

$$\begin{aligned} & E(X_2|T = \tau)f_{X_0|T=\tau}(s)f_{X_1|T=\tau}(s) \\ &= e^{-\nu_0(t-t_0)-\nu_1t_0} \sum_{i \in Z} E(X_2|T = \tau)\beta_i s^i \end{aligned}$$

Furthermore,  $sf'_{X_0|T=\tau}(s)f_{X_1|T=\tau}(s)$  in equation (5) can be expressed as

$$\begin{aligned} & sf'_{X_0|T=\tau}(s)f_{X_1|T=\tau}(s) \\ &= s\nu_0(t-\tau)\psi'_0(s) \times \exp(\nu_0(t-t_0)(\psi_0(s)-1) + \nu_1t_0(\psi_1(s)-1)) \\ &= s\nu_0(t-\tau)(b_0-d_0/s^2) \times e^{((\nu_0(t-t_0)b_0+\nu_1t_0b_1)s+(\nu_0(t-t_0)d_0+\nu_1t_0d_1)/s)} e^{-\nu_0(t-t_0)-\nu_1t_0} \\ &= \nu_0(t-\tau)(b_0s-d_0/s)e^{-\nu_0(t-t_0)-\nu_1t_0} \left( \sum_{i \in Z} \beta_i s^i \right) \\ &= e^{-\nu_0(t-t_0)-\nu_1t_0} \left( \sum_{i \in Z} \nu_0(t-\tau)b_0\beta_i s^{i+1} - \sum_{i \in Z} \nu_0(t-\tau)d_0\beta_i s^{i-1} \right) \\ &= e^{-\nu_0(t-t_0)-\nu_1t_0} \left( \nu_0(t-\tau)b_0 \sum_{(i-1) \in Z} \beta_{i-1} s^i - \nu_0(t-\tau)d_0 \sum_{(i+1) \in Z} \beta_{i+1} s^i \right) \\ &= e^{-\nu_0(t-t_0)-\nu_1t_0} \left( \nu_0(t-\tau)b_0 \sum_{i \in Z} \beta_{i-1} s^i - \nu_0(t-\tau)d_0 \sum_{i \in Z} \beta_{i+1} s^i \right) \end{aligned}$$

Therefore, when  $t_0 < \tau \leq t$

$$\begin{aligned} \sum_i E[Y_2, Y_1 = i|T = \tau]s^i &= E[X_2|T = \tau]f_{X_0|T=\tau}(s)f_{X_1|T=\tau}(s) + sf'_{X_0|T=\tau}(s)f_{X_1|T=\tau}(s) \\ &= e^{-\nu_0(t-t_0)-\nu_1t_0} \sum_{i \in Z} [E[X_2|T = \tau]\beta_i + \nu_0(t-\tau)b_0\beta_{i-1} - \nu_0(t-\tau)d_0\beta_{i+1}]s^i \\ &= e^{-\nu_0(t-t_0)-\nu_1t_0} \sum_{i \in Z} \{ \nu_0(t-\tau)b_0\beta_{i-1} - \nu_0(t-\tau)d_0\beta_{i+1} \\ &\quad + [\nu_0(\tau-t_0)(b_0-d_0) + \nu_2t_0(b_2-d_2)]e^{\nu_0(\tau-t_0)(b_0+d_0-1)+\nu_2t_0(b_2+d_2-1)}\beta_i \} s^i \end{aligned}$$

which yields

$$\begin{aligned} E[Y_2, Y_1 = i|T = \tau] &= e^{-\nu_0(t-t_0)-\nu_1t_0} \{ \nu_0(t-\tau)b_0\beta_{i-1} - \nu_0(t-\tau)d_0\beta_{i+1} \\ &\quad + [\nu_0(\tau-t_0)(b_0-d_0) + \nu_2t_0(b_2-d_2)]e^{\nu_0(\tau-t_0)(b_0+d_0-1)+\nu_2t_0(b_2+d_2-1)}\beta_i \} \end{aligned}$$

and provides the desired computable form of Equ. (10)

If  $\tau > t$ , analogous computations yield

$$\begin{aligned} E[Y_2, Y_1 = i] &= \int_t^\infty E[Y_2, Y_1 = i|T = \tau]f_T(\tau)d\tau \\ &= E[Y_2, Y_1 = i|T = \tau]P[T > \tau] \\ &= e^{-\frac{t-t_0}{2N_0}-\nu_1t_0-\nu_0(t-t_0)}\beta_i \{ \nu_0(t-t_0)(b_0-d_0) + \\ &\quad + \nu_2t_0(b_2-d_2) \} e^{\nu_0(t-t_0)(b_0+d_0-1)+\nu_2t_0(b_2+d_2-1)} \end{aligned}$$

Similarly as derivation of Equ. (10), Equ. (11) can be fully derived from Equ. (2), (6) and (9) for its computable form, where

$$\begin{aligned} & \text{if } \tau \leq t_0, \\ & E[Y'_1, Y_1 = i|T = \tau] = e^{-\nu_0(t-t_0)-\nu_1t_0} \{ [\nu_0(t-t_0)b_0 + \nu_1(t_0-\tau)b_1]\beta_{i-1} + \nu_1\tau(b_1-d_1)e^{\nu_1\tau(b_1+d_1-1)}\beta_i - [\nu_0(t-t_0)d_0 + \nu_1(t_0-\tau)d_1]\beta_{i+1} \} \end{aligned}$$

$$\begin{aligned} & \text{if } t_0 < \tau \leq t, \\ & E[Y'_1, Y_1 = i|T = \tau] = e^{-\nu_0(t-t_0)-\nu_1t_0} \{ \nu_0(t-\tau)b_0\beta_{i-1} - \nu_0(t-\tau)d_0\beta_{i+1} + [\nu_0(\tau-t_0)(b_0-d_0) + \nu_1t_0(b_1-d_1)]e^{\nu_0(\tau-t_0)(b_0+d_0-1)+\nu_1t_0(b_1+d_1-1)}\beta_i \} \end{aligned}$$

and if  $\tau > t$ ,

$$E[Y_1', Y_1 = i | T = \tau] = e^{-\nu_0(t-t_0) - \nu_1 t_0} [\nu_0(t-t_0)(b_0 - d_0) + \nu_1 t_0(b_1 - d_1)] e^{\nu_0(t-t_0)(b_0+d_0-1) + \nu_1 t_0(b_1+d_1-1)} \beta_i$$

### Derivation of computational expression for equation (12)

The probability generating function of  $(Y_1|T) = (X_0|T) + (X_1|T)$  is equal to  $f_{X_0|T=\tau}(s)f_{X_1|T=\tau}(s)$  because  $(X_0|T)$  is conditionally independent of  $(X_1|T)$ .

Therefore,

$$\begin{aligned} \sum_i P(Y_1 = i | T = \tau) s^i &= f_{X_0|T=\tau}(s) f_{X_1|T=\tau}(s) \\ &= \exp(\nu_0(t-t_0)(\psi_0(s) - 1) + \nu_1 t_0(\psi_1(s) - 1)) \\ &= e^{-\nu_0(t-t_0) - \nu_1 t_0} \sum_{i \in Z} \beta_i s^i \end{aligned}$$

which yields  $P(Y_1 = i) = \int_0^\infty P(Y_1 = i | T = \tau) f_T(\tau) d\tau = e^{-\nu_0(t-t_0) - \nu_1 t_0} \beta_i$ , the derived computational expression for Equ. (12).

### Derivation of equations (13) and (14)

By definition,

$$\begin{aligned} E[Y_2 | Y_1 \geq x] &= \frac{E[Y_2, Y_1 \geq x]}{P(Y_1 \geq x)} \\ &= \frac{\sum_j j P(Y_2 = j, Y_1 \geq x)}{\sum_{i \geq x} P(Y_1 = i)} \\ &= \frac{\sum_j j \sum_{i \geq x} P(Y_2 = j, Y_1 = i)}{\sum_{i \geq x} P(Y_1 = i)} \\ &= \frac{\sum_{i \geq x} (\sum_j j P(Y_2 = j, Y_1 = i))}{\sum_{i \geq x} P(Y_1 = i)} \\ &= \frac{\sum_{i \geq x} E[Y_2, Y_1 = i]}{\sum_{i \geq x} P(Y_1 = i)} \end{aligned}$$

Equation (13) has been derived. Similarly, Equ. (14) can be derived.

### Derivation of the range for the estimate of $t$

We denote random variable  $L$  as the incremental allele length of a sampled individual, and show the computation of the expectation  $E[L]$  and variance  $V[L]$  given  $t, t_0, \nu_0, \nu_1, b_0$  and  $b_1$ , where  $t$  and  $t_0$  are expressed in generation units.

Let  $L_0, L_1$  be two random variables that denote the allele length increments in time interval  $t$  to  $t_0$  (ancestral population 0) and  $t_0$  to present (cognate population 1), respectively.

Let  $X_i$  be the incremental change in the  $i$ th generation of the ancestral population (from  $t$  to  $t_0$ ). We may obtain  $P(X_i = 1) = \nu_0 b_0$ ,  $P(X_i = -1) = \nu_0(1 - b_0)$ ,  $P(X_i = 0) = 1 - \nu_0$  and

$$\begin{aligned} E[X_i] &= 2\nu_0 b_0 - \nu_0 \\ V[X_i] &= \nu_0 - \nu_0^2 (2b_0 - 1)^2 \end{aligned}$$

Based on the fact that the incremental change of allele length in any generation is independent of that in any other generation, we have

$$\begin{aligned} E[L_0] &= (t - t_0) E[X_i] = (t - t_0) \nu_0 (2b_0 - 1) \\ V[L_0] &= (t - t_0) V[X_i] = (t - t_0) \nu_0 [1 - \nu_0 (2b_0 - 1)^2] \end{aligned}$$

Similarly we derive  $E[L_1]$  and  $V[L_1]$  as

$$\begin{aligned} E[L_1] &= t_0\nu_1(2b_1 - 1) \\ V[L_1] &= t_0\nu_1[1 - \nu_1(2b_1 - 1)^2] \end{aligned}$$

Therefore, we obtain

$$\begin{aligned} E[L] &= E[L_0] + E[L_1] = (t - t_0)\nu_0(2b_0 - 1) + t_0\nu_1(2b_1 - 1) \\ V[L] &= V[L_0] + V[L_1] \\ &= (t - t_0)\nu_0[1 - \nu_0(2b_0 - 1)^2] + t_0\nu_1[1 - \nu_1(2b_1 - 1)^2] \end{aligned}$$

Assuming that  $L$  is approximately Gaussian and given  $x$  as the threshold of allele size discovery, we calculate  $P(L \geq x)$  from the cdf of the Gaussian distribution. This helps to determine a realistic range of estimates of  $t$  to control the probability of locus discovery.

### Derivation of $E[Y'_1; Y_1 = i]$ in the extended model

From the Equ. (16) derived earlier on, we obtain

$$f_T(\tau) = \begin{cases} (\frac{1}{2N_m})\exp[-\sum_{k=m+1}^L (\frac{t_{k-1}-t_k}{2N_k}) - \frac{\tau-t_m}{2N_m}]; & t < \tau \leq t_{m-1}, \\ \exp[-\sum_{k=1}^L (\frac{t_{k-1}-t_k}{2N_k}) - \frac{\tau-t_0}{2N_0}]; & \tau > t_0. \end{cases}$$

If  $\tau \leq t_0$  and  $t_m < \tau \leq t_{m-1}$  ( $m = 1, 2, \dots, L$ ), we obtain

$$\begin{aligned} E[Y'_1; Y_1 = i | T = \tau] &= e^{-\nu_0(t-t_0)-\nu_1t_0} \{[\nu_0(t-t_0)b_0 + \nu_1(t_0-\tau)b_1]\beta_{i-1} \\ &\quad + \nu_1\tau(b_1-d_1)\beta_i - [\nu_0(t-t_0)d_0 + \nu_1(t_0-\tau)d_1]\beta_{i+1}\} \\ E[Y'_1; Y_1 = i] &= \sum_{m=1}^L \int_{t_m}^{t_{m-1}} E[Y'_1; Y_1 = i | T = \tau] (\frac{1}{2N_m}) \exp[-\sum_{k=m+1}^L (\frac{t_{k-1}-t_k}{2N_k}) - \frac{\tau-t_m}{2N_m}] d\tau \end{aligned}$$

where  $\beta_i$  is the same as that defined and used in the derivation of Eqs. (10) and (11) in the main text. If  $t_0 < \tau \leq t$ , we obtain

$$\begin{aligned} E[Y'_1; Y_1 = i | T = \tau] &= e^{-\nu_0(t-t_0)-\nu_1t_0} \{ \nu_0(t-\tau)b_0\beta_{i-1} \\ &\quad + [\nu_0(\tau-t_0)(b_0-d_0) + \nu_1t_0(b_1-d_1)]\beta_i - \nu_0(t-\tau)d_0\beta_{i+1} \} \\ E[Y'_1; Y_1 = i] &= \int_{t_0}^t E[Y'_1; Y_1 = i | T = \tau] (\frac{1}{2N_0}) \exp[-\sum_{k=1}^L (\frac{t_{k-1}-t_k}{2N_k}) - \frac{\tau-t_0}{2N_0}] d\tau \end{aligned}$$

If  $\tau > t$ , we obtain

$$E[Y'_1; Y_1 = i | T = \tau] = e^{-\nu_0(t-t_0)-\nu_1t_0} [\nu_0(t-t_0)(b_0-d_0) + \nu_1t_0(b_1-d_1)]\beta_i$$

which is not a function of  $\tau$ .

Therefore

$$\begin{aligned} E[Y'_1; Y_1 = i] &= \int_t^\infty E[Y'_1; Y_1 = i | T = \tau] f_T(\tau) d\tau = E[Y'_1; Y_1 = i | T = \tau] P(T > t) \\ &= e^{-\sum_{k=1}^L (\frac{t_{k-1}-t_k}{2N_k}) - \frac{\tau-t_0}{2N_0} - \nu_0(t-t_0) - \nu_1t_0} [\nu_0(t-t_0)(b_0-d_0) + \nu_1t_0(b_1-d_1)]\beta_i \end{aligned}$$

With the analytical derivation shown here we are able to compute the allele length difference  $D$  with Human population size arbitrarily varied from generation to generation.
